# Supplementary material
Source: PubMed Central journal article supplement (PMC3892408)

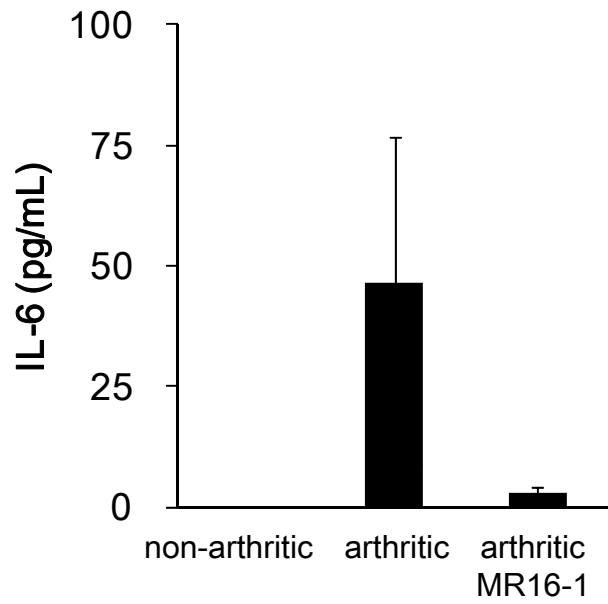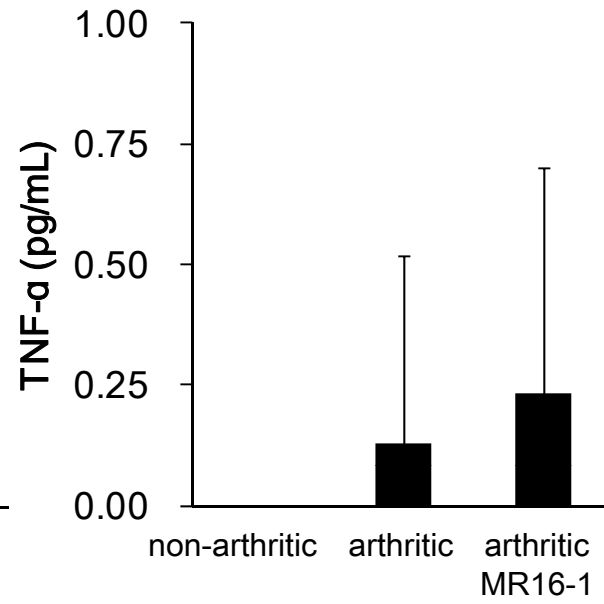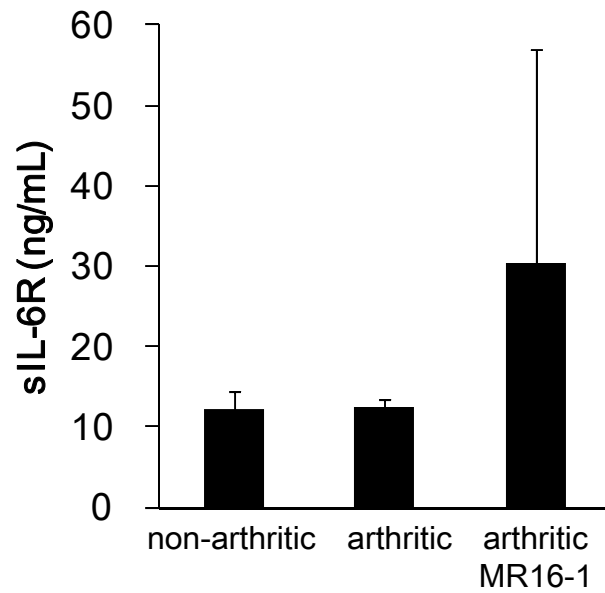

Supplement: cei0175-0172-SD1.pdf [file cei0175-0172-SD1.pdf]
